# Supplementary material for: Improving the physicochemical and in vitro hypolipidemic properties of soluble dietary fiber in camellia seed residue by a cellulose degrading fungus YC49
Source: Royal Society of Chemistry journal article supplement (doi:10.1039/d2fo02401b), 2022-01-01
Supplement: d2fo02401b1.pdf [file d2fo02401b1.pdf]

**Table S1** Factors and levels in the response surface analysis

| Factors                     | Levels |    |    |
|-----------------------------|--------|----|----|
|                             | -1     | 0  | 1  |
| A- Fermentation time (d)    | 3      | 4  | 5  |
| B- Initial pH               | 6      | 7  | 8  |
| C- Liquid-solid ratio (v:w) | 20     | 25 | 30 |

**Table S2** Box-Behnken design of the response surface analysis

| Runs | A: Fermentation time (d) | B: Initial pH | C: Lipid-soild ratio (v:w) | SDF yield (%) |
|------|--------------------------|---------------|----------------------------|---------------|
| 1    | 5                        | 7             | 20                         | 16.896        |
| 2    | 4                        | 7             | 25                         | 19.078        |
| 3    | 3                        | 7             | 30                         | 17.582        |
| 4    | 4                        | 6             | 20                         | 15.266        |
| 5    | 5                        | 6             | 25                         | 15.89         |
| 6    | 3                        | 7             | 20                         | 15.422        |
| 7    | 4                        | 7             | 25                         | 19.562        |
| 8    | 4                        | 7             | 25                         | 19.266        |
| 9    | 5                        | 7             | 30                         | 17.272        |
| 10   | 4                        | 8             | 30                         | 17.766        |
| 11   | 4                        | 6             | 30                         | 16.288        |
| 12   | 3                        | 8             | 25                         | 15.41         |
| 13   | 4                        | 7             | 25                         | 19.902        |
| 14   | 5                        | 8             | 25                         | 17.574        |
| 15   | 4                        | 8             | 20                         | 16.856        |
| 16   | 3                        | 6             | 25                         | 15.808        |
| 17   | 4                        | 7             | 25                         | 18.784        |

**Table S3** ANOVA for the response surface model.

| Source                  | Sum of Squares | df | Mean Square | F-value | p-value  | Significance <sup>a</sup> |
|-------------------------|----------------|----|-------------|---------|----------|---------------------------|
| Model                   | 36.97          | 9  | 4.11        | 21.54   | 0.0003   | **                        |
| A-Time                  | 1.45           | 1  | 1.45        | 7.62    | 0.0281   | *                         |
| B-pH                    | 2.37           | 1  | 2.37        | 12.43   | 0.0097   | **                        |
| C-ratio                 | 2.5            | 1  | 2.5         | 13.09   | 0.0085   | **                        |
| AB                      | 1.08           | 1  | 1.08        | 5.68    | 0.0486   | *                         |
| AC                      | 0.7957         | 1  | 0.7957      | 4.17    | 0.0804   |                           |
| BC                      | 0.0031         | 1  | 0.0031      | 0.0164  | 0.9016   |                           |
| A <sup>2</sup>          | 8.85           | 1  | 8.85        | 46.39   | 0.0003   | **                        |
| B <sup>2</sup>          | 12.15          | 1  | 12.15       | 63.69   | < 0.0001 | **                        |
| C <sup>2</sup>          | 4.87           | 1  | 4.87        | 25.56   | 0.0015   | **                        |
| Residual                | 1.33           | 7  | 0.1907      |         |          |                           |
| Lack of Fit             | 0.5889         | 3  | 0.1963      | 1.05    | 0.4614   | not significant           |
| Pure Error              | 0.7461         | 4  | 0.1865      |         |          |                           |
| Cor Total               | 38.31          | 16 |             |         |          |                           |
| R <sup>2</sup>          | 0.9652         |    |             |         |          |                           |
| Adjusted R <sup>2</sup> | 0.9203         | □  | □           | □       | □        | □                         |

<sup>a</sup> Significance: \*  $P < 0.05$ , \*\*  $P < 0.01$ ,

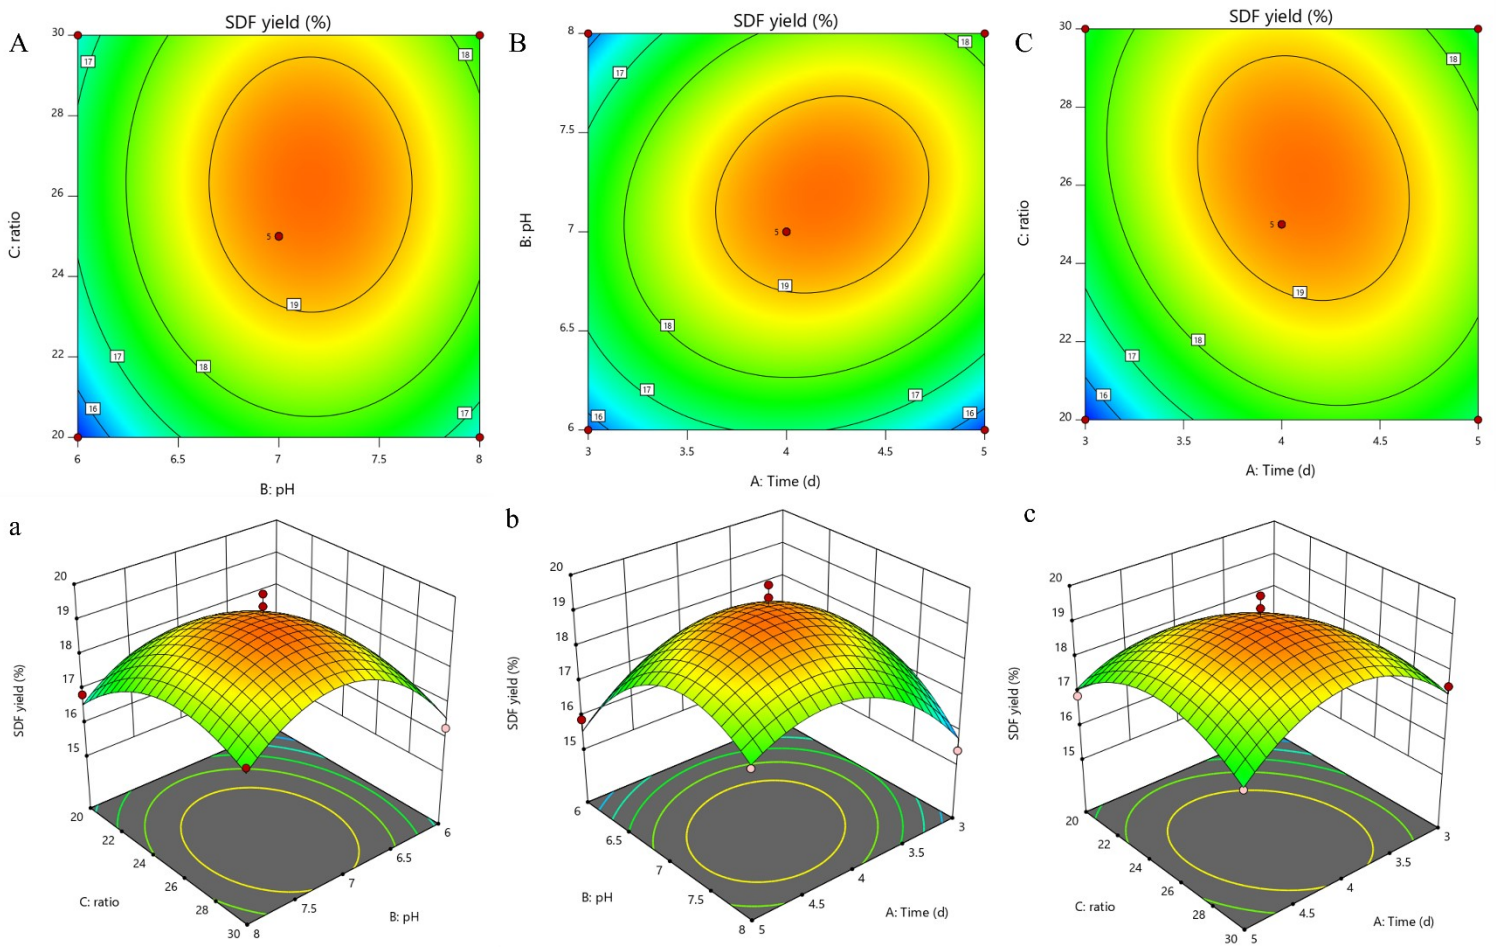

**Figure S1** Response surface plots. (A, a) effect of lipid-solid ratio and initial pH on the yield of SDF; (B, b) effect of initial pH and fermentation time on the yield of SDF; (C, c) effect of lipid-solid ratio and fermentation time on the yield of SDF.

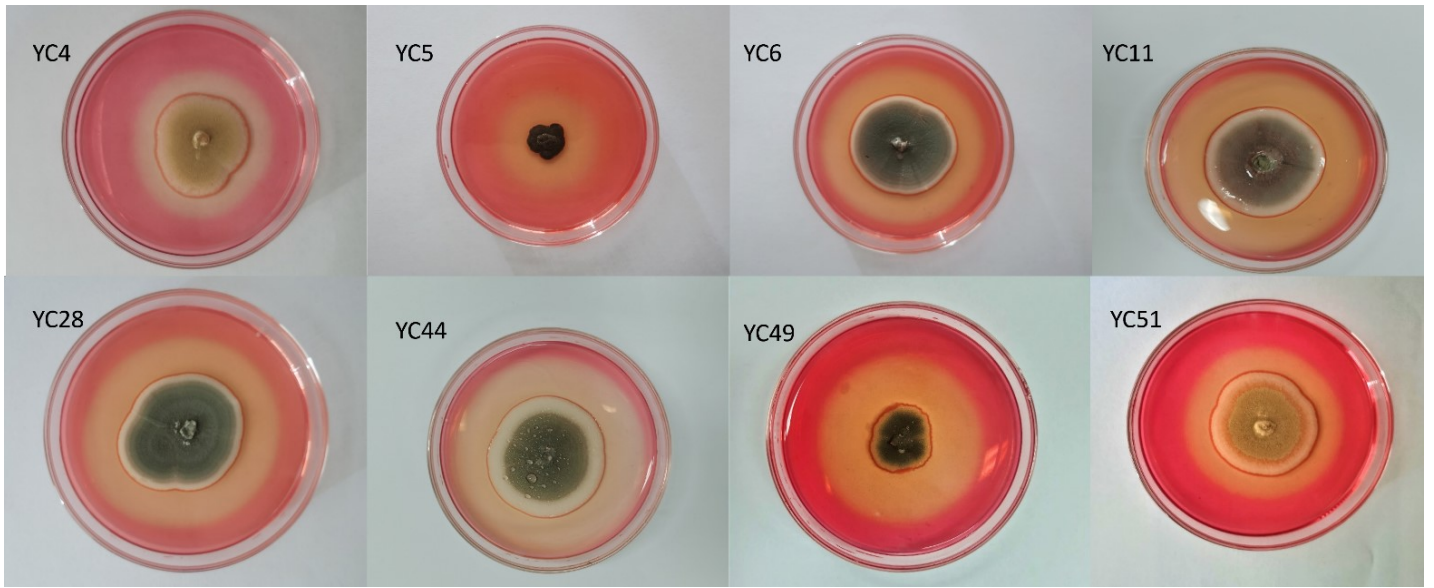

**Figure S2.** Congo red staining results of the eight strains entering the re-screening
